# Supplementary material
Source: PubMed Central journal article supplement (PMC3457456)
Supplement: JCM.01423-12_zjm999091941so1.pdf [file JCM.01423-12_zjm999091941so1.pdf]

**Table S1** Biochemical tests that were found to be negative for all uropathogenic *E. coli* tested and were not included in the differentiation between UPEC isolates

| Test                              | Abb.             | Test                             | Abb.  | Test                                | Abb.  |
|-----------------------------------|------------------|----------------------------------|-------|-------------------------------------|-------|
| Ala-phe-pro arylamidase           | APPA             | Glutamyl arylamidase Pna         | AGLTp | Citrate (sodium)                    | CIT   |
| L-pyrrolydonyl-arylamidase        | PyrA             | $\beta$ -glucosidase             | BGLU  | $\alpha$ -glucosidase               | AGLU  |
| L-arabitol                        | IARL             | $\beta$ -xylosidase              | BXYL  | $\beta$ -N-acetyl-galactosaminidase | NAGA  |
| D-cellobiose                      | dCEL             | $\beta$ -alanine arylamidase pNA | BAIap | L-histidine assimilation            | IHISa |
| H <sub>2</sub> S production       | H <sub>2</sub> S | Lipase                           | LIP   | Glu-gly-arg- arylamidase            | GGAA  |
| $\beta$ -N-acetyl-glucosaminidase | BNAG             | Palatinose                       | PLE   |                                     |       |
